# Supplementary material for: 3,4-Dihydroxiphenylacetic Acid-Based Universal Coating Technique for Magnetic Nanoparticles Stabilization for Biomedical Applications
Source: MDPI journal article supplement (doi:10.3390/jfb14090461), 2023-09-06
Supplement: s1 [file s1]

## Supplementary Materials

Table S1. Magnetic properties of the synthesized magnetic cores

| MNP Core                               | Saturation Magnetization<br>$J_S$ , $A \cdot m^2/kg$ | Remanent Magnetization<br>$J_R$ , $A \cdot m^2/kg$ | Coercivity<br>$H_C$ , kOe |
|----------------------------------------|------------------------------------------------------|----------------------------------------------------|---------------------------|
| CoFe-OAm-1                             | 45                                                   | 14                                                 | 0.07                      |
| Mag-OAm-2                              | 72                                                   | 14                                                 | 0.09                      |
| CoFe-OA-1                              | 52                                                   | 26                                                 | 1.9                       |
| CoFe-OAm-2                             | 71                                                   | 27                                                 | 1.5                       |
| CoFe-OAm-5                             | 81                                                   | 31                                                 | 0.8                       |
| CoFe <sub>2</sub> O <sub>4</sub> (pre) | 62                                                   | 15                                                 | 0.37                      |
| Fe <sub>3</sub> O <sub>4</sub> -OA     | 62                                                   | 3                                                  | 0.03                      |
| CoFe <sub>2</sub> O <sub>4</sub> -OA   | 80                                                   | 7                                                  | 0.1                       |
| MnFe <sub>2</sub> O <sub>4</sub> -OA   | 77                                                   | 7                                                  | 0.1                       |
| ZnFe <sub>2</sub> O <sub>4</sub> -OA   | 74                                                   | 7                                                  | 0.9                       |
| Fe <sub>3</sub> O <sub>4</sub> /Au     | 64                                                   | 5                                                  | 0.07                      |

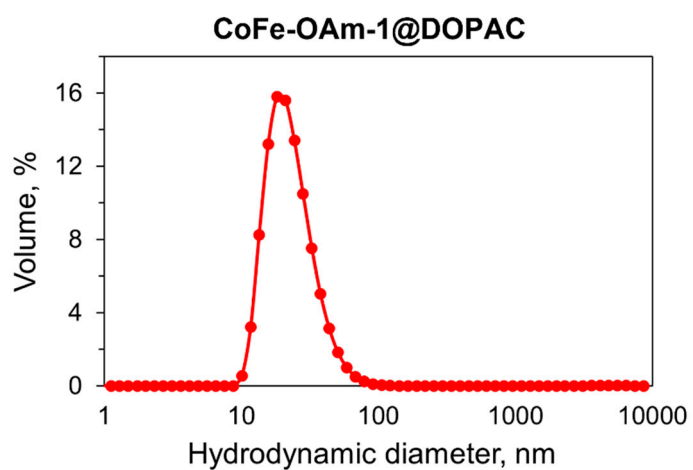

Figure S1. DLS measurements of CoFe-OAm-1@DOPAC nanoparticles size distribution.

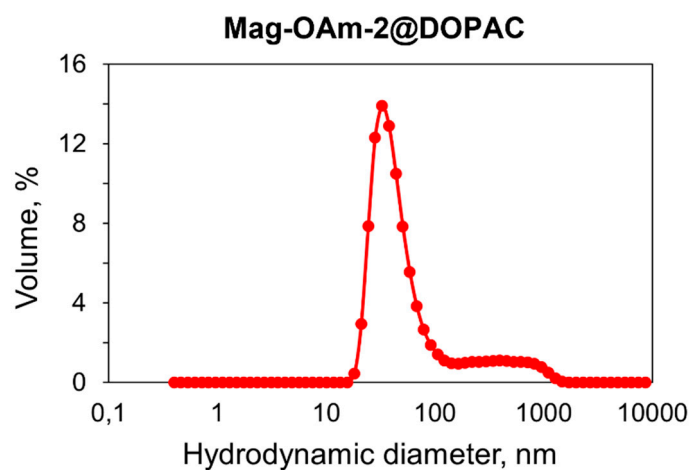

Figure S2. DLS measurements of Mag-OAm-2@DOPAC nanoparticles size distribution.

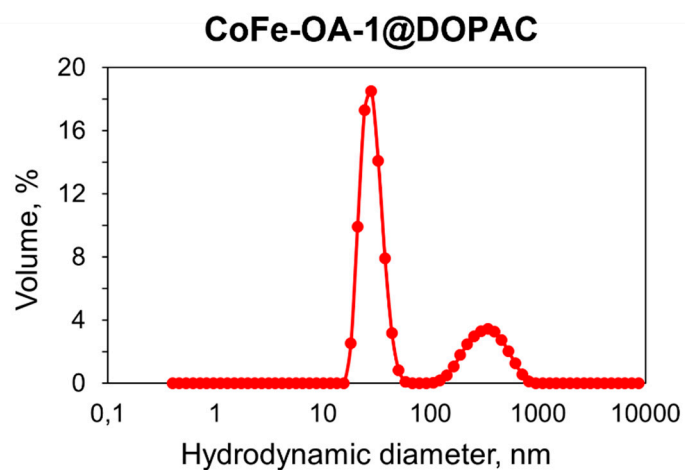

Figure S3. DLS measurements of CoFe-OA-1@DOPAC nanoparticles size distribution.

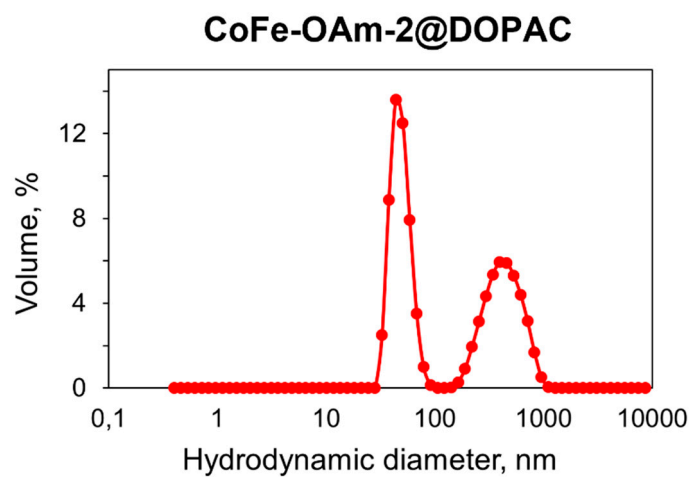

Figure S4. DLS measurements of CoFe-OAm-2@DOPAC nanoparticles size distribution.

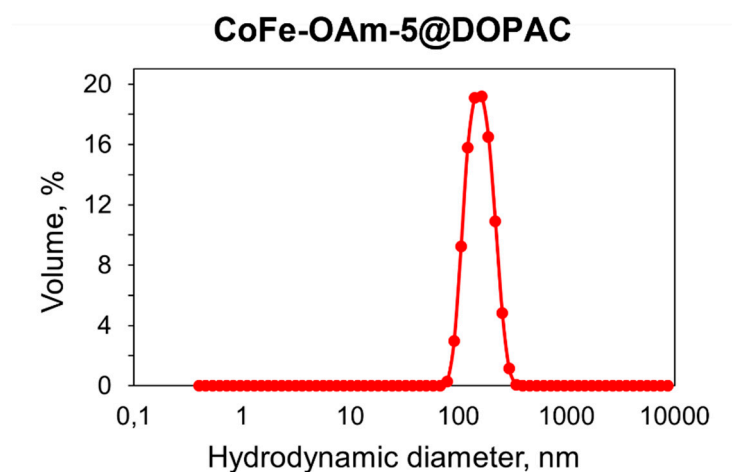

Figure S5. DLS measurements of CoFe-OAm-5@DOPAC nanoparticles size distribution.

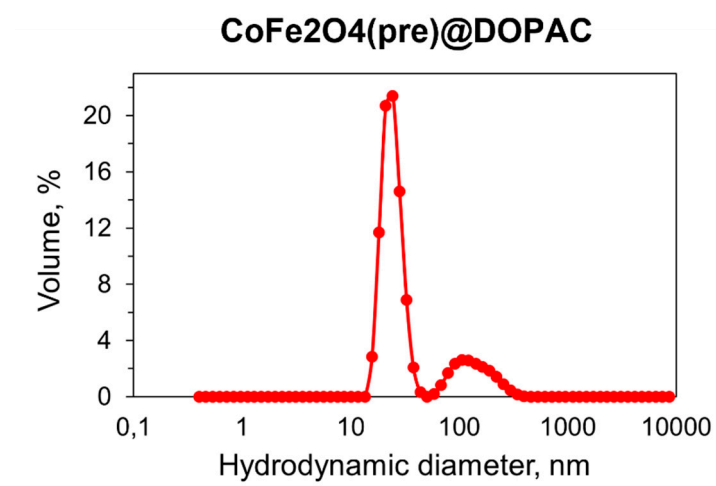

Figure S6. DLS measurements of CoFe<sub>2</sub>O<sub>4</sub>(pre)@DOPAC nanoparticles size distribution.

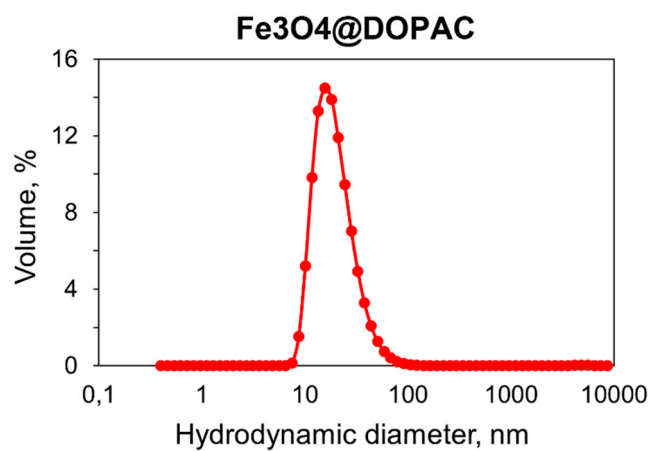

Figure S7. DLS measurements of Fe<sub>3</sub>O<sub>4</sub>@DOPAC nanoparticles size distribution.

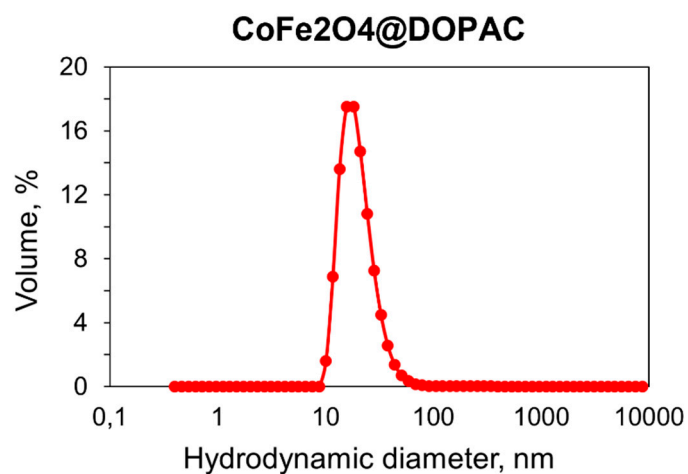

Figure S8. DLS measurements of CoFe<sub>2</sub>O<sub>4</sub>@DOPAC nanoparticles size distribution.

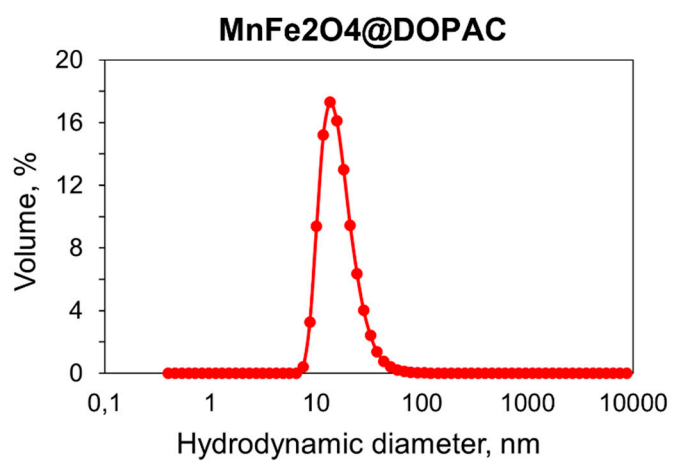

Figure S9. DLS measurements of MnFe<sub>2</sub>O<sub>4</sub>@DOPAC nanoparticles size distribution.

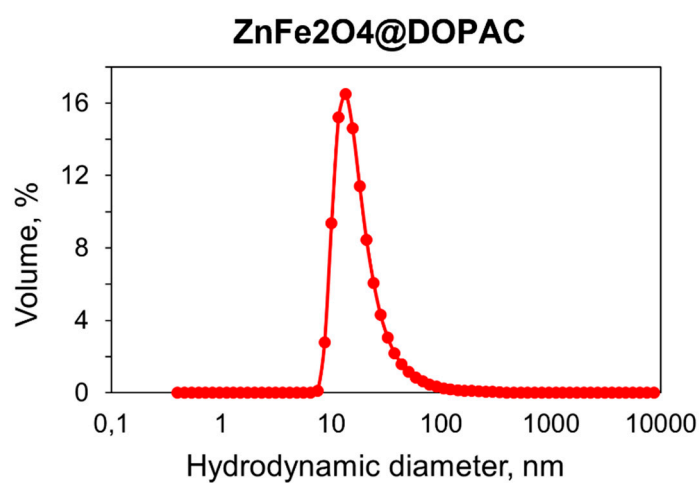

Figure S10. DLS measurements of ZnFe<sub>2</sub>O<sub>4</sub>@DOPAC nanoparticles size distribution.

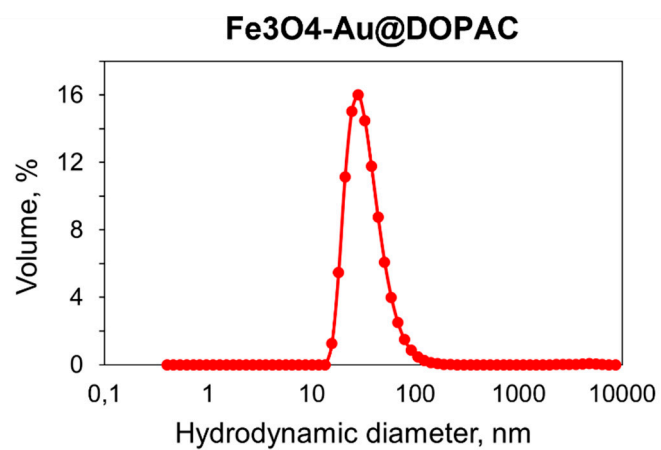

Figure S11. DLS measurements of Fe<sub>3</sub>O<sub>4</sub>-Au@DOPAC nanoparticles size distribution.
